# Supplementary material for: Development of a checklist for evaluating psychiatric reports
Source: PubMed Central journal article supplement (PMC6498494; doi:10.1186/s12909-019-1559-1), 2019-05-02
Supplement: 12909_2019_1559_MOESM3_ESM.pdf [file 12909_2019_1559_MOESM3_ESM.pdf]

|                                        | Topic                               | Points                           |               |
|----------------------------------------|-------------------------------------|----------------------------------|---------------|
|                                        |                                     | Available points                 | Gained points |
| <b>1:<br/>Chief complaint</b>          | Admission procedures                | (1 point)                        |               |
|                                        | Current complaints                  | (3 points)                       |               |
|                                        |                                     | <b>In total (max. 4 points)</b>  |               |
| <b>2:<br/>Substance abuse</b>          | Consumed substances                 | (1 point)                        |               |
|                                        | Consumed quantity                   | (1 point)                        |               |
|                                        | Duration of addiction               | (1 point)                        |               |
|                                        |                                     | <b>In total (max. 3 points)</b>  |               |
| <b>3:<br/>Biography</b>                | Family status                       | (1 point)                        |               |
|                                        | Profession                          | (1 point)                        |               |
|                                        | Education                           | (1 point)                        |               |
|                                        |                                     | <b>In total (max. 3 points)</b>  |               |
| <b>4:<br/>Past psychiatric history</b> | Frequency of episodes               | (1 point)                        |               |
|                                        | Different diagnosis (if necessary)  | (1 point)                        |               |
|                                        | Duration of disease (since when?)   | (1 point)                        |               |
|                                        |                                     | <b>In total (max. 3 points)</b>  |               |
| <b>5:<br/>Family history</b>           |                                     | <b>In total (max. 1 point )</b>  |               |
| <b>6:<br/>Past medical history</b>     | Comorbidities                       | (1 point)                        |               |
|                                        |                                     | <b>In total (max. 1 point)</b>   |               |
| <b>7: Mental State Examination</b>     | Orientation                         | (2 points)                       |               |
|                                        | Interaction                         | (1 point)                        |               |
|                                        | Attention/concentration             | (1 point)                        |               |
|                                        | Sleep                               | (1 point)                        |               |
|                                        | Appearance                          | (1 point)                        |               |
|                                        | Memory                              | (1 point)                        |               |
|                                        | Thought process                     | (2 points)                       |               |
|                                        | Fears                               | (1 point)                        |               |
|                                        | Compulsions                         | (1 point)                        |               |
|                                        | Delusion                            | (2 points)                       |               |
|                                        | Perceptual disturbances             | (2 points)                       |               |
|                                        | Self-disorders                      | (2 points)                       |               |
|                                        | Affect                              | (2 points)                       |               |
|                                        | Psychomotor activity                | (1 point)                        |               |
|                                        | Suicidality                         | (2 points)                       |               |
|                                        | Endangerment to self                | (1 point)                        |               |
|                                        | Endangerment to others              | (1 point)                        |               |
|                                        | Illness insight                     | (1 point)                        |               |
|                                        |                                     | <b>In total (max. 25 points)</b> |               |
| <b>8:<br/>Diagnosis</b>                | Correct diagnosis                   | (3 points)                       |               |
|                                        | Explained why making this diagnosis | (2 points)                       |               |
|                                        |                                     |                                  |               |
|                                        |                                     | <b>In total (max. 5 points)</b>  |               |

|                                |                                 |                   |  |
|--------------------------------|---------------------------------|-------------------|--|
| <b>9:<br/>Impression</b>       | Confirmability of statements    | <i>(1 point)</i>  |  |
|                                | Structure                       | <i>(2 points)</i> |  |
|                                | Coherence                       | <i>(2 points)</i> |  |
|                                | <b>In total (max. 5 points)</b> |                   |  |
| <b>Total sum MAX 50 Points</b> |                                 |                   |  |

**Additional File 4** Checklist to evaluate the report
